# Supplementary material
Source: PubMed Central journal article supplement (PMC5766366)
Supplement: NIHMS925860-supplement-1.pdf [file NIHMS925860-supplement-1.pdf]

**Cell, Volume 172**

**Supplemental Information**

**Leptin Mediates a Glucose-Fatty Acid Cycle  
to Maintain Glucose Homeostasis in Starvation**

**Rachel J. Perry, Yongliang Wang, Gary W. Cline, Aviva Rabin-Court, Joongyu D. Song, Sylvie Dufour, Xian Man Zhang, Kitt Falk Petersen, and Gerald I. Shulman**

| <b>Fasting time (hr)</b> | <b>Fast start</b> | <b>Refeed start</b> | <b>Fast start</b> | <b>Sacrifice</b> |
|--------------------------|-------------------|---------------------|-------------------|------------------|
| 0                        | 12:00 (Day 0)     | 12:00 (Day 1)       | N/A               | 14:00 (Day 1)    |
| 1                        | 11:00 (Day 0)     | 11:00 (Day 1)       | 13:00 (Day 1)     | 14:00 (Day 1)    |
| 6                        | 6:00 (Day 0)      | 6:00 (Day 1)        | 8:00 (Day 1)      | 14:00 (Day 1)    |
| 7                        | 5:00 (Day 0)      | 5:00 (Day 1)        | 7:00 (Day 1)      | 14:00 (Day 1)    |
| 8                        | 4:00 (Day 0)      | 4:00 (Day 1)        | 6:00 (Day 1)      | 14:00 (Day 1)    |
| 16                       | 20:00 (Day 0)     | 20:00 (Day 1)       | 22:00 (Day 1)     | 14:00 (Day 2)    |
| 17                       | 19:00 (Day 0)     | 19:00 (Day 1)       | 21:00 (Day 1)     | 14:00 (Day 3)    |
| 47                       | 13:00 (Day 0)     | 13:00 (Day 1)       | 15:00 (Day 1)     | 14:00 (Day 3)    |
| 48                       | 12:00 (Day 0)     | 12:00 (Day 1)       | 14:00 (Day 1)     | 14:00 (Day 3)    |

**Table S1.** Fasting, refeeding, and fasting timelines.
