# Supplementary material
Source: PubMed Central journal article supplement (PMC5766366)
Supplement: NIHMS925860-supplement-2.pdf [file NIHMS925860-supplement-2.pdf]

| <b>Tracer</b>                                        | <b>Prime infusion rate<br/>[<math>\mu\text{mol}/(\text{kg}\cdot\text{min})</math>]</b> | <b>Continuous infusion rate<br/>[<math>\mu\text{mol}/(\text{kg}\cdot\text{min})</math>]</b> | <b>Source</b>      |
|------------------------------------------------------|----------------------------------------------------------------------------------------|---------------------------------------------------------------------------------------------|--------------------|
| [1,2,3,4,5,6,6- <sup>2</sup> H <sub>7</sub> ]glucose | 1.8                                                                                    | 0.6                                                                                         | Cambridge Isotopes |
| [U- <sup>13</sup> C <sub>16</sub> ]palmitate         | 2.1                                                                                    | 0.7                                                                                         | Cambridge Isotopes |
| [1,1,2,3,3- <sup>2</sup> H <sub>5</sub> ]glycerol    | 4.5                                                                                    | 1.5                                                                                         | Sigma              |
| [U- <sup>13</sup> C <sub>4</sub> ] $\beta$ -OHB      | 3.0                                                                                    | 1.0                                                                                         | Cambridge Isotopes |
| [2,3,3,3- <sup>2</sup> H <sub>4</sub> ]alanine       | 15.0                                                                                   | 5.0                                                                                         | Cambridge Isotopes |
| [3- <sup>13</sup> C]lactate                          | 120                                                                                    | 40                                                                                          | Cambridge Isotopes |

**Table S2.** Tracer infusion rates used in this study.
